# Supplementary material for: Longitudinal Follow-Up of Mirror Movements after Stroke: A Case Study
Source: Case Rep Neurol Med. 2015 Nov 15;2015:354134. doi: 10.1155/2015/354134 (PMC4663000; doi:10.1155/2015/354134)
Supplement: Supplementary file 1 — Time-course of changes of voluntary movement of affected hand and mirror movement of unaffected hand. Movie clip shows typical examples of initial day, 5 months and 13 months. Data in Figure 2 were obtained from this movie clip. [file 354134.f1.zip]

Archive with 2 entries (1 files):
- 354134.f1/
- 354134.f1/354134.f1.mp4
